# Projected Impact of Implementing the Results of the Diabetes Prevention Program in the U.S. Population

SHARON H. SAYDAH, PHD, MHS<sup>1</sup>  
 DANITA BYRD-HOLT<sup>1</sup>  
 MAUREEN I. HARRIS, PHD, MPH<sup>2</sup>

**OBJECTIVE** — To determine the feasibility of using either fasting plasma glucose or HbA<sub>1c</sub> to identify individuals in the U.S. population who meet the Diabetes Prevention Program (DPP) criteria for intervention, defined as BMI  $\geq 24$  kg/m<sup>2</sup>, fasting plasma glucose level 96–125 mg/dl, and 2-h glucose level 140–199 mg/dl in an oral glucose tolerance test (OGTT).

**RESEARCH DESIGN AND METHODS** — Analysis of a representative sample of U.S. adults aged 40–74 years with no medical history of diabetes for whom data on height, weight, fasting plasma glucose, HbA<sub>1c</sub>, and 2-h plasma glucose during an OGTT were obtained. Sensitivity, specificity, positive predictive value (PPV), and receiver operator characteristic (ROC) curves for fasting glucose and HbA<sub>1c</sub> were determined.

**RESULTS** — Using BMI  $< 24$  kg/m<sup>2</sup> as an initial criterion eliminated 27.2% of U.S. adults from further testing. Of the remaining group, 41.1% did not have to be considered for an OGTT because their fasting glucose level was below or above 96–125 mg/dl. Overall, 10.6% of adults aged 40–74 years without medical history of diabetes met the DPP eligibility criteria for intervention. Among individuals with BMI  $\geq 24$  kg/m<sup>2</sup> and fasting glucose level 96–125 mg/dl, applying a fasting plasma glucose cutoff of  $\geq 105$  mg/dl excluded 62.5% of this group and resulted in 56.0% of those with 2-h glucose level 140–199 mg/dl in this group being identified, with a specificity of 72.0% and a PPV of 17.1%. Similar values were obtained for an HbA<sub>1c</sub> cutoff value of  $\geq 5.5\%$ .

**CONCLUSIONS** — Using data on BMI and setting cutoff values for fasting glucose and HbA<sub>1c</sub> would greatly reduce the number of individuals who would need to undergo an OGTT while achieving adequate sensitivity, specificity, and PPV.

*Diabetes Care* 25:1940–1945, 2002

The U.S. Diabetes Prevention Program (DPP) and the Diabetes Prevention Study in Finland were the first major randomized, controlled clinical trials to investigate whether type 2 diabetes could be prevented; both studies were completed in 2001. Before these studies, it was unknown whether type 2

diabetes could be prevented by lifestyle or pharmaceutical intervention. The studies indicate that metformin or lifestyle interventions can have dramatic effects in preventing type 2 diabetes. In both trials, individuals at high risk for diabetes based on BMI, fasting plasma glucose, and response to an oral glucose tolerance test

(OGTT) reduced their risk of diabetes by 58% by participating in a structured physical activity and weight loss program (1,2). The risk was reduced by 31% in participants taking metformin in the DPP. The DPP intervention was applied to individuals at high risk for diabetes based on BMI  $\geq 24$  kg/m<sup>2</sup>, fasting plasma glucose level 96–125 mg/dl, and 2-h plasma glucose level 140–199 mg/dl at 2 h after an oral glucose challenge (3). It was estimated that 10 million people in the U.S. would meet these criteria and that a substantial reduction in diabetes incidence would occur if the DPP interventions were implemented in these people (1).

Diabetes presents a significant public health burden associated with increased morbidity, mortality, and economic costs. Diabetes leads to increased rates of microvascular disease (retinopathy, neuropathy, renal disease, and lower extremity amputations), coronary heart disease and peripheral vascular disease, stroke, and disability and a reduced life expectancy of 7–8 years (4). It is estimated that \$44 billion in direct costs, including inpatient care and nursing homes, was spent on diabetes in 1997 and \$54 million was incurred in indirect costs, including disability and premature mortality (5). Furthermore, the prevalence of diabetes in the U.S. has increased fivefold in the past 30 years, and it is projected that 21.4 million people will have diabetes in the U.S. by 2025 (6).

Because of the success of the DPP interventions and the significant public health burden presented by diabetes, a program to identify individuals at high risk for diabetes and meeting the DPP criteria would offer a method to implement a program to markedly reduce diabetes in the U.S. One barrier to identifying these individuals is the need to administer an OGTT. Currently, few physicians and patients are willing to undergo an OGTT due to the time, inconvenience, and expense of the test. Indeed, the American Diabetes Association (ADA) recommended abandonment of the OGTT as a screening and diagnostic test for diabetes

From <sup>1</sup>Social and Scientific Systems, Silver Spring, Maryland; and the <sup>2</sup>National Institute of Diabetes and Digestive and Kidney Diseases, Bethesda, Maryland.

Address correspondence and reprint requests to Sharon H. Saydah, 8757 Georgia Ave., 12th Floor, Silver Spring, MD 20910. E-mail: ssaydah@s-3.com.

Received for publication 6 February 2002 and accepted in revised form 21 June 2002.

**Abbreviations:** DPP, Diabetes Prevention Program; NHANES III, third National Health and Nutrition Examination Survey; OGTT, oral glucose tolerance test; PPV, positive predictive value; ROC, receiver operator characteristic.

The opinions expressed in this paper are those of the authors and do not necessarily represent the position of the National Institute of Diabetes and Digestive and Kidney Diseases.

A table elsewhere in this issue shows conventional and Système International (SI) units and conversion factors for many substances.

See accompanying editorial on p. 2098.

(7). An alternative is to use fasting glucose or HbA<sub>1c</sub> levels to identify individuals who meet the DPP criteria.

To investigate this issue, we analyzed data from a representative sample of U.S. adults to determine the sensitivity, specificity, and positive predictive value (PPV) of using fasting glucose or HbA<sub>1c</sub> or a combination of both to identify individuals who meet the DPP criteria for intervention.

## RESEARCH DESIGN AND METHODS

### Design, setting, and participants

The third National Health and Nutrition Examination Survey (NHANES III) was conducted from 1988 to 1994 and included a stratified probability sample of the U.S. population (8). Participants were interviewed in their homes and underwent a standardized set of physical examinations and laboratory measurements in an examination center. After an overnight fast of  $\geq 9$  h, a venous blood sample was obtained and a 2-h 75-g OGTT was administered to the subset of subjects who were aged 40–74 years and did not report a prior diagnosis of diabetes ( $n = 2,844$ ) (9). The OGTT was only administered to NHANES III participants aged 40–74 years, whereas the eligibility for DPP was  $\geq 25$  years of age. Consequently, we do not have information for the U.S. population aged 25–39 years or for those aged  $\geq 75$  years.

### Statistical analysis

We determined the sensitivity, specificity, PPV, and likelihood ratio of fasting glucose and HbA<sub>1c</sub> to accurately identify individuals with 2-h glucose level 140–199 mg/dl and specifically those who met the DPP eligibility criteria. Sensitivity, specificity, and PPV were determined for a series of 5-mg/dl cut points for fasting glucose and 0.5% cut points for HbA<sub>1c</sub>. Receiver operator characteristic (ROC) curves were plotted for fasting glucose and HbA<sub>1c</sub> and the area under the curve was calculated. Comparisons between fasting glucose and HbA<sub>1c</sub> and between groups were performed using the  $\chi^2$  test statistic. Analyses were performed using SUDAAN version 7.5 software (Research Triangle Institute, Research Triangle Park, NC) with appropriate sampling weights to account for the complex survey design and to provide nationally representative estimates. ROC curves were

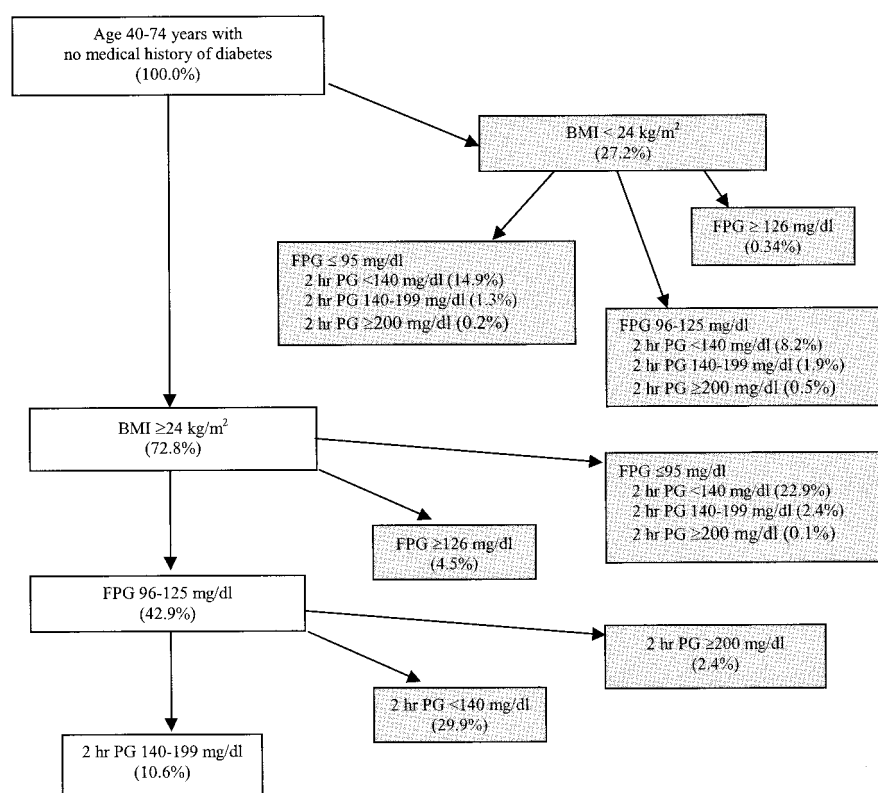

**Figure 1**—Distribution of the U.S. adults aged 40–74 years according to DPP eligibility criteria. Shaded boxes indicate individuals who do not meet DPP eligibility criteria at each stage. All percentages are calculated relative to the entire group aged 40–74 years, with no medical history of diabetes as the denominator. Percentages are weighted to adjust for the complex sampling scheme of the survey to reflect percentages in the U.S. population. FPG, fasting plasma glucose; 2 hr PG, plasma glucose at 2 h during an OGTT.

plotted using STATA version 7.0 software (Stata, College Station, TX).

**RESULTS**— The DPP determined eligibility for the study by administering an OGTT only to individuals with BMI  $\geq 24$  kg/m² and fasting plasma glucose level 96–125 mg/dl; those with 2-h glucose level 140–199 mg/dl were eligible for the study (3,10). Based on NHANES III, 27.2% of the U.S. population aged 40–74 years with no medical history of diabetes had BMI < 24 kg/m² and 72.8% had BMI  $\geq 24$  kg/m² (Fig. 1). Of those with BMI  $\geq 24$  kg/m², 6.2% had a fasting plasma glucose level  $\geq 126$  mg/dl and would be classified as having newly diagnosed diabetes. These individuals would be recommended for confirmatory testing for diabetes in accordance with ADA recommendations (7). Of those with BMI  $\geq 24$  kg/m², 34.9% had fasting plasma glucose level < 96 mg/dl and would not meet the DPP eligibility criteria for intervention and are considered to be at low risk for

diabetes. The remainder (58.9%) of those with BMI  $\geq 24$  kg/m² had fasting plasma glucose level 96–125 mg/dl. Among those with BMI  $\geq 24$  kg/m² and fasting glucose level 96–125 mg/dl, 69.6% had 2-h plasma glucose level < 140 mg/dl (normal glucose tolerance), 24.8% had 2-h glucose level 140–199 mg/dl (impaired glucose tolerance), and 5.6% had 2-h glucose level  $\geq 200$  mg/dl (newly diagnosed diabetes). Those with newly diagnosed diabetes, classified by 2-h glucose level  $\geq 200$  mg/dl, were recommended for further testing and treatment. In summary, among those aged 40–74 years with no medical history of diabetes in the U.S. population, 10.6% would meet the DPP eligibility criteria for intervention ( $100\% \times 0.728 \times 0.589 \times 0.248$ ).

Based on the ROC curve for subjects with BMI  $\geq 24$  kg/m² and fasting plasma glucose level 96–125 mg/dl, the area under the curve, to predict 2-h glucose level 140–199 mg/dl, for fasting plasma glu-

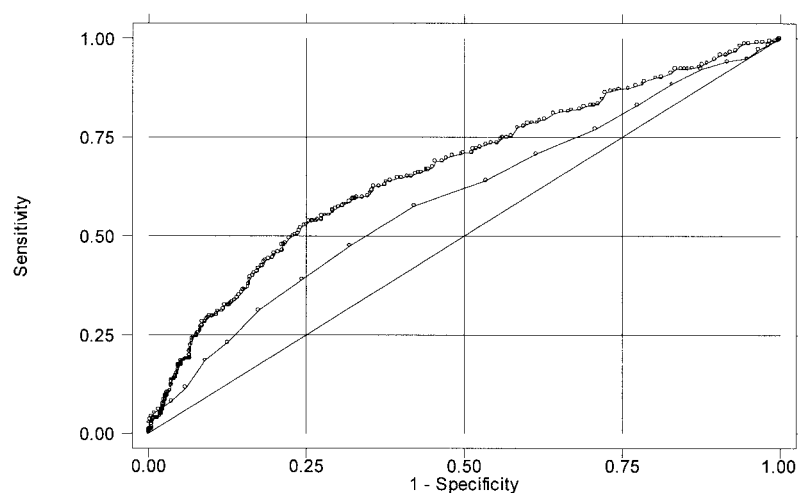

**Figure 2**—ROC curve for fasting plasma glucose and HbA<sub>1c</sub> for adults aged 40–74 years with no medical history of diabetes and with BMI  $\geq 24$  kg/m<sup>2</sup> and fasting plasma glucose 96–125 mg/dl. The line with the closely spaced circles is the ROC curve for fasting plasma glucose (area under the curve 0.6653). The line with the widely spaced circles is the ROC curve for HbA<sub>1c</sub> (area under the curve 0.5927). The solid line represents an area under the curve of 0.500.

cose level and HbA<sub>1c</sub> was 0.665 (95% CI 0.630–0.700) and 0.593 (0.557–0.629), respectively, and differed significantly ( $P = 0.002$ ) (Fig. 2). We stratified further to determine whether including other factors known to be associated with elevated 2-h glucose level improved the accuracy of fasting plasma glucose or HbA<sub>1c</sub>. The ROC curves after stratification by age (40–59 vs. 60–74 years), race (non-Hispanic white versus all others) and family history (having a first-degree relative with diabetes versus no first-degree relative) did not differ significantly. Stratifying by age, the area under the curve for fasting glucose for those aged 40–59

years was 0.569 (0.517–0.620) and for those aged 60–74 years was 0.596 (0.546–0.647;  $P = 0.452$ ). Stratifying by race, the area under the curve for fasting glucose for non-Hispanic whites was 0.633 (0.584–0.682) and for all others was 0.655 (0.611–0.697;  $P = 0.522$ ). Stratifying by family history, the area under the curve for fasting glucose for those with no family history was 0.627 (0.587–0.667) and for those with a family history was 0.689 (0.634–0.742;  $P = 0.075$ ).

Among those with BMI  $\geq 24$  kg/m<sup>2</sup> and fasting plasma glucose level 96–125 mg/dl (i.e., those eligible for the OGTT in DPP), as fasting glucose values increased,

the sensitivity of fasting glucose to identify individuals with 2-h glucose level 140–199 mg/dl decreased, the specificity increased, and the PPV increased (Table 1). The likelihood ratio for the odds that a given cut point of fasting glucose would be expected in an individual with 2-h glucose level 140–199 mg/dl was highest at fasting glucose level  $\geq 115$  mg/dl. At fasting glucose level  $\geq 105$  mg/dl, which included 37.5% of participants, the sensitivity of fasting glucose to identify the individuals with 2-h glucose of 140–199 mg/dl was 56.0%, the specificity was 72.0%, and the PPV was 17.1%. Similarly, at HbA<sub>1c</sub>  $\geq 5.5\%$ , which included 38.3% of participants, the sensitivity of HbA<sub>1c</sub> to identify the individuals with 2-h glucose level 140–199 mg/dl was 60.0%, the specificity was 55.0%, and the PPV was 21.4% (Table 1). Requiring both fasting glucose level  $\geq 105$  mg/dl and HbA<sub>1c</sub>  $\geq 5.5\%$  decreased the sensitivity to 33.4% but increased the specificity to 84.8% and PPV to 37.9%. Requiring either fasting glucose level  $\geq 105$  mg/dl or HbA<sub>1c</sub>  $\geq 5.5\%$  increased the sensitivity to 82.6% but decreased the specificity to 42.3% and did not substantially change the PPV (31.3%). Using a higher fasting glucose cut point of  $\geq 110$  mg/dl decreased the sensitivity further, increased the specificity, and did not substantially change the PPV. Similarly, using a higher HbA<sub>1c</sub> cut point of  $\geq 6.0\%$  also decreased the sensitivity, increased the specificity, and did not substantially change the PPV (Table 2).

Increasing BMI from  $\geq 24$  to  $\geq 27$  or

**Table 1**—Sensitivity, specificity, PPV, and likelihood ratio for identifying individuals who have a 2-h glucose of 140–199 mg/dl among U.S. adults aged 40–74 years with BMI  $\geq 24$  kg/m<sup>2</sup> and a fasting glucose of 96–125 mg/dl, according to fasting plasma glucose and HbA<sub>1c</sub> cut points

| Glycemic measure        | Cut points | Percent distribution | Sensitivity (%) | Specificity (%) | PPV (%)         | Likelihood ratio |
|-------------------------|------------|----------------------|-----------------|-----------------|-----------------|------------------|
| Fasting glucose (mg/dl) |            |                      |                 |                 |                 |                  |
|                         | $\geq 100$ | 66.2                 | 76.5 $\pm$ 3.5  | 37.9 $\pm$ 2.8  | 17.9 $\pm$ 2.9  | 1.23             |
|                         | $\geq 105$ | 37.5                 | 56.0 $\pm$ 5.1  | 72.0 $\pm$ 1.9  | 17.1 $\pm$ 2.9  | 2.00             |
|                         | $\geq 110$ | 20.7                 | 34.9 $\pm$ 4.5  | 86.9 $\pm$ 1.5  | 31.4 $\pm$ 4.7  | 2.66             |
|                         | $\geq 115$ | 10.2                 | 19.9 $\pm$ 3.6  | 95.4 $\pm$ 1.0  | 33.9 $\pm$ 6.5  | 4.33             |
|                         | $\geq 120$ | 4.5                  | 7.5 $\pm$ 2.7   | 97.4 $\pm$ 0.9  | 54.3 $\pm$ 7.6  | 2.88             |
| HbA <sub>1c</sub> (%)   |            |                      |                 |                 |                 |                  |
|                         | $\geq 4.5$ | 97.7                 | 98.0 $\pm$ 1.2  | 1.8 $\pm$ 0.9   | 24.2 $\pm$ 18.9 | 1.00             |
|                         | $\geq 5.0$ | 80.2                 | 90.2 $\pm$ 2.3  | 17.2 $\pm$ 2.4  | 14.9 $\pm$ 4.5  | 1.09             |
|                         | $\geq 5.5$ | 38.3                 | 60.0 $\pm$ 3.4  | 55.0 $\pm$ 4.3  | 21.4 $\pm$ 2.2  | 1.33             |
|                         | $\geq 6.0$ | 8.2                  | 16.7 $\pm$ 2.4  | 92.9 $\pm$ 1.3  | 27.6 $\pm$ 4.4  | 2.35             |
|                         | $\geq 6.5$ | 0.9                  | 1.6 $\pm$ 0.5   | 99.3 $\pm$ 0.4  | 39.8 $\pm$ 5.3  | 2.29             |

Data are means  $\pm$  SD unless otherwise indicated.

**Table 2—Sensitivity, specificity, and PPV for identifying individuals who have a 2-h glucose of 140–199 mg/dl among U.S. adults aged 40–74 years with BMI  $\geq 24$  kg/m<sup>2</sup> and a fasting glucose 96–125 mg/dl using combinations of fasting glucose or HbA<sub>1c</sub> cut points**

|                                    | Sensitivity (%) | Specificity (%) | PPV (%)* |
|------------------------------------|-----------------|-----------------|----------|
| Fasting glucose $\geq 105$ mg/dl   |                 |                 |          |
| and HbA <sub>1c</sub> $\geq 5.5\%$ | 33.4            | 84.8            | 37.9     |
| or HbA <sub>1c</sub> $\geq 5.5\%$  | 82.6            | 42.3            | 31.2     |
| and HbA <sub>1c</sub> $\geq 6.0\%$ | 11.2            | 97.5            | 45.1     |
| or HbA <sub>1c</sub> $\geq 6.0\%$  | 61.5            | 67.5            | 36.1     |
| Fasting glucose $\geq 110$ mg/dl   |                 |                 |          |
| and HbA <sub>1c</sub> $\geq 5.5\%$ | 21.1            | 93.5            | 42.3     |
| or HbA <sub>1c</sub> $\geq 5.5\%$  | 73.8            | 48.7            | 31.4     |
| and HbA <sub>1c</sub> $\geq 6.0\%$ | 6.2             | 98.7            | 42.3     |
| or HbA <sub>1c</sub> $\geq 6.0\%$  | 45.5            | 81.3            | 40.4     |

$\geq 30$  kg/m<sup>2</sup> resulted in an increase in sensitivity and PPV for both fasting glucose and HbA<sub>1c</sub> (Table 3). For those aged 60–74 years, sensitivity, specificity, and PPV for fasting glucose and HbA<sub>1c</sub> were somewhat better than for those aged 40–59 years, but the differences were not substantial. The effect of race was minor for fasting plasma glucose but, for HbA<sub>1c</sub>, non-Hispanic whites had lower sensitivity and higher specificity than all others.

**CONCLUSIONS**— Identification of individuals who would meet the criteria for a DPP intervention is both a public health and a clinical issue. It could also be an enormous undertaking, given the fact that there are ~95 million people aged 40–74 years without a medical history of

diagnosed diabetes in the U.S. (11,12). The DPP recruited participants at high risk for developing diabetes based on BMI, fasting plasma glucose level, and response to an OGTT. To determine those who might be eligible for a DPP intervention in the general U.S. population to reduce their risk of developing diabetes, measurement of height and weight could immediately eliminate from further testing the 27.2% of individuals with BMI  $< 24$  kg/m<sup>2</sup>. Measurement of fasting plasma glucose in those with BMI  $\geq 24$  kg/m<sup>2</sup> would eliminate 41.1% of this group who are below or above the DPP fasting plasma glucose criteria. For the remaining 41 million individuals with BMI  $\geq 24$  kg/m<sup>2</sup> and fasting plasma glucose level 96–125 mg/dl, setting the fasting

glucose cutoff value at  $\geq 105$  mg/dl would eliminate 62.5% from further testing by the OGTT while including fully 56.0% of those with 2-h glucose level 140–199 mg/dl. Thus, for the 95 million people aged 40–74 years without diagnosed diabetes, 15 million would have to undergo an OGTT by this scheme. A similar procedure could be followed using HbA<sub>1c</sub>  $\geq 5.5\%$ , which does not require an individual to be fasting and can be measured in a blood sample collected without regard to time of the prior meal. If HbA<sub>1c</sub> is used, the method for measuring HbA<sub>1c</sub> would have to be standardized to the Diabetes Control and Complications (DCCT) method (13) to use the same cutoff values as in Table 1.

Although the results are representative of the U.S. population, we only have data on individuals aged 40–74 years. Therefore, we cannot draw specific conclusions for those aged  $> 74$  years or  $< 40$  years. In addition, the data in NHANES III were collected from 1988 to 1994. The prevalence of being overweight or obese (BMI  $\geq 25$  kg/m<sup>2</sup>) in the U.S. was ~5% higher in 1999 than during NHANES III (14). This increase likely corresponds to an increase in the prevalence of those with elevated fasting and 2-h glucose values. Therefore, the overall prevalence of individuals who would meet the DPP criteria for intervention likely has increased. The increase in prevalence would not affect the sensitivity or specificity of the meth-

**Table 3—Sensitivity, specificity, and PPV for identifying individuals who have a 2-h glucose of 140–199 mg/dl among U.S. adults aged 40–74 years with BMI  $\geq 24$  kg/m<sup>2</sup> and fasting glucose 96–125 mg/dl, according to BMI, age, and race/ethnicity**

|                                         | Sensitivity (%) | Specificity (%) | PPV (%)        |
|-----------------------------------------|-----------------|-----------------|----------------|
| Fasting plasma glucose $\geq 105$ mg/dl |                 |                 |                |
| BMI $\geq 24$ kg/m <sup>2</sup>         | 56.0 $\pm$ 5.1  | 72.0 $\pm$ 1.9  | 17.1 $\pm$ 2.9 |
| BMI $\geq 27$ kg/m <sup>2</sup>         | 62.9 $\pm$ 5.5  | 69.8 $\pm$ 2.6  | 39.0 $\pm$ 4.7 |
| BMI $\geq 30$ kg/m <sup>2</sup>         | 65.4 $\pm$ 6.9  | 72.1 $\pm$ 3.4  | 42.5 $\pm$ 5.4 |
| Age 40–59 years                         | 49.1 $\pm$ 7.3  | 73.2 $\pm$ 2.4  | 15.8 $\pm$ 4.2 |
| Age 60–74 years                         | 58.7 $\pm$ 4.7  | 69.7 $\pm$ 2.9  | 22.4 $\pm$ 3.0 |
| Non-Hispanic whites                     | 53.4 $\pm$ 5.3  | 72.7 $\pm$ 2.0  | 18.7 $\pm$ 3.3 |
| All others                              | 51.9 $\pm$ 7.4  | 70.2 $\pm$ 3.2  | 15.7 $\pm$ 4.0 |
| HbA <sub>1c</sub> $\geq 5.5\%$          |                 |                 |                |
| BMI $\geq 24$ kg/m <sup>2</sup>         | 60.0 $\pm$ 3.4  | 55.0 $\pm$ 4.3  | 21.4 $\pm$ 2.2 |
| BMI $\geq 27$ kg/m <sup>2</sup>         | 67.5 $\pm$ 3.7  | 52.1 $\pm$ 4.6  | 32.7 $\pm$ 3.7 |
| BMI $\geq 30$ kg/m <sup>2</sup>         | 71.8 $\pm$ 4.7  | 55.5 $\pm$ 4.7  | 37.4 $\pm$ 4.0 |
| Age 40–59 years                         | 52.7 $\pm$ 5.4  | 59.8 $\pm$ 4.7  | 16.9 $\pm$ 2.6 |
| Age 60–74 years                         | 61.5 $\pm$ 4.2  | 46.6 $\pm$ 3.1  | 28.2 $\pm$ 4.3 |
| Non-Hispanic whites                     | 56.7 $\pm$ 3.8  | 60.3 $\pm$ 4.2  | 21.5 $\pm$ 2.3 |
| All others                              | 74.7 $\pm$ 5.1  | 40.0 $\pm$ 4.1  | 16.3 $\pm$ 3.5 |

Data are means  $\pm$  SD.



ods proposed but would increase the PPV slightly. The prevalence of diabetes and abnormal glucose tolerance increases with increasing age and BMI and is higher in those of minority race/ethnicity (9). The DPP lifestyle intervention for reducing the incidence of diabetes was almost equally effective in each gender, BMI, and race/ethnicity group and showed the greatest reduction in incidence of diabetes for individuals aged  $\geq 60$  years (1). For metformin, the risk reduction relative to the placebo group was greater for younger individuals and overweight individuals than for older and less overweight individuals.

Ideally, a screening test should have high sensitivity and high specificity; it is desirable to miss very few people who have the disease and to not misclassify a large number of people who do not have the disease. In the identification of people meeting the DPP criteria, these requirements may not be necessary. By using a fasting plasma glucose cutoff value of  $\geq 105$  mg/dl, 44.0% of DPP-eligible individuals will be missed. However, an annual measurement of fasting glucose would address this issue. In the DPP control group, 11.0% progressed to diabetes per year (1). Therefore, only 4.8% ( $11.0\% \times 0.44$ ) of DPP-eligible individuals who were not entered into a DPP type of intervention program would progress to diabetes between annual measurements of fasting plasma glucose, and 9.6% of DPP-eligible individuals would progress to diabetes if fasting glucose was measured every other year. If it were desired to increase the number of people found to have 2-h glucose levels of 140–199 mg/dl, sensitivity could be increased by setting the fasting glucose cutoff level at  $\geq 100$  mg/dl. This would markedly decrease specificity (and increase the number of OGTTs that need to be performed), but because 2-h glucose values of 140–199 mg/dl do not constitute disease, identifying more individuals needing an OGTT to confirm whether they have elevated postchallenge glucose carries far less stigma and social burden than having a low specificity on a test for diagnosing a disease. However, identifying too many people for an OGTT would also place a greater burden, in terms of time and cost, on both the individual patient and the health care system and physician. Another option would be to increase the fasting glucose cutoff level to  $\geq 110$  mg/dl, which corresponds to the ADA definition

for impaired fasting glucose. Increasing the cutoff increases the specificity, resulting in fewer false positives, but decreases the sensitivity and results in a greater number of false negatives. Overall, the fasting glucose cutoff level proposed seems to be a balance between sensitivity and specificity with 2:1 odds of identifying an individual with 2-h glucose between 140 and 199 mg/dl. Neither fasting plasma glucose nor HbA<sub>1c</sub> alone are ideal screening tests. Based on the ROC curve analysis, neither includes an area under the curve significantly greater than the 0.50 that is expected by chance alone. In other words, once individuals are identified as having a BMI  $\geq 24$  kg/m<sup>2</sup> and fasting glucose between 96 and 125 mg/dl, specific cut points of fasting glucose within that range do not improve the chances of identifying an individual as having 2-h glucose between 140 and 199 mg/dl without performing an OGTT. The same can be said for various cut points of HbA<sub>1c</sub>. Therefore, to find individuals eligible for the DPP intervention, clinicians can eliminate a large proportion of individuals from further testing based on BMI  $\geq 24$  kg/m<sup>2</sup> and fasting glucose 96–125 mg/dl. Using either fasting glucose  $\geq 105$  mg/dl or HbA<sub>1c</sub>  $\geq 5.5\%$  would further reduce the number of individuals who would undergo further testing with the understanding that a portion of eligible individuals may be missed.

Even though individuals with BMI  $< 24$  kg/m<sup>2</sup> would not meet the DPP criteria for intervention, there are still a number of people in this group who have elevated 2-h glucose levels and who presumably would be at increased risk for diabetes. However, because such individuals were not included in DPP, we have no information regarding whether the intervention would be effective. Furthermore, in these individuals, BMI is considered normal and a structured weight loss program may not be advisable.

Few studies have examined the ability to identify individuals with abnormal glucose tolerance without administering an OGTT. Overall, these studies found that the sensitivity of fasting glucose to identify individuals with impaired glucose tolerance was fairly low (15,16) and that HbA<sub>1c</sub> was fairly specific but not very sensitive (17–19). However, only one of these studies focused specifically on screening for impaired glucose tolerance

(15) and none were representative of the general U.S. population.

For a screening program to be effective, it must have a number of attributes: 1) the disease should represent a sizable burden to the population; 2) it should have a preclinical phase during which it can be diagnosed; and 3) it should have improved prognosis after diagnosis. Based on the promising results from DPP and the Finnish Diabetes Prevention Study, diabetes now meets all three of these attributes. Data from NHANES III provide physicians and public health officials a clearer idea of the number of OGTTs and the scope of the screening that would need to be undertaken to implement DPP. It was estimated that 10 million people in the U.S. meet the DPP criteria for eligibility for intervention and that 11.0% of these will develop diabetes in 1 year (1). Reducing the risk of diabetes by 58% within this group would significantly reduce the burden of diabetes in the U.S. and potentially prevent many complications and premature deaths.

## References

1. Diabetes Prevention Program Research Group: The Diabetes Prevention Program: reduction in the incidence of type 2 diabetes with lifestyle intervention or metformin. *N Engl J Med* 346:393–403, 2002
2. Tuomilehto J, Lindstrom J, Eriksson JG, Valle TT, Hamalainen H, Ilanne-Parikka P, Keinonen-Kiukaanniemi S, Laakso M, Louheranta A, Rastas M, Salminen V, Uusitupa M, Finnish Diabetes Prevention Study Group: Prevention of type 2 diabetes mellitus by changes in lifestyle among subjects with impaired glucose tolerance. *N Engl J Med* 344:1343–1350, 2001
3. Diabetes Prevention Program Research Group: The Diabetes Prevention Program: design and methods for a clinical trial in the prevention of type 2 diabetes. *Diabetes Care* 22:623–634, 1999
4. Harris MI. Summary. In *Diabetes in America*. 2nd ed. National Institute of Diabetes and Digestive and Kidney Diseases, National Institutes of Health, Bethesda, MD, 1995, p. 1–13
5. American Diabetes Association: Economic consequences of diabetes. *Diabetes Care* 21:296–309, 1998
6. King H, Aubert RE, Herman WH: Global burden of diabetes, 1995–2025. *Diabetes Care* 21:1414–1431, 1998
7. Expert Committee on the Diagnosis and Classification of Diabetes Mellitus: Report of the Expert Committee on the Diagnosis and Classification of Diabetes Mellitus.

- Diabetes Care* 20:1183–1197, 1997
8. National Center for Health Statistics: *Plan and Operation of the Third National Health and Nutrition Examination Survey, 1988–1994*. Hyattsville, MD, National Center for Health Statistics, 1994 (Vital and Health Statistic Ser. 1, no. 32)
  9. Harris MI, Flegal KM, Cowie CC, Eberhardt SM, Goldstein DE, Little RR, Weidmeyer HM, Byrd-Holt DD: Prevalence of diabetes, impaired fasting glucose and impaired glucose tolerance in U.S. adults: the third National Health and Nutrition Examination Survey, 1988–1994. *Diabetes Care* 21:518–524, 1998
  10. Diabetes Prevention Program Research Group: The Diabetes Prevention Program: baseline characteristics of the randomized cohort. *Diabetes Care* 23:1619–1629, 2000
  11. U.S. Census Bureau: *Profiles of General Demographic Characteristics. 2000 Census of Population and Housing, United States*. Washington, DC, U.S. Department of Commerce, May 2001
  12. CDC Wonder, data 2010 website, focus area 05 diabetes, September 2001. Available from <http://wonder.cdc.gov/data2010.focus.htm>. Accessed 26 November 2001
  13. Little RR, Rohlfing CL, Wiedmeyer HM, Myers GL, Sacks DB, Goldstein DE, NGSP Steering Committee: The national glycohemoglobin standardization program: a five-year progress report. *Clin Chem* 47:1985–1992, 2001
  14. Prevalence of overweight and obesity among adults: United States, 1999. Available from <http://www.cdc.gov/nchs/products/pubs/pubd/hestats/obese/obse99.htm>. Accessed 31 January 2002
  15. Drzewoski J, Czupryniak L: Concordance between fasting and 2-hour post-glucose challenge criteria for the diagnosis of diabetes mellitus and glucose intolerance in high risk individuals. *Diabet Med* 18:29–31, 2001
  16. Lindahl B, Weinehall L, Asplund K, Göran H: Screening for impaired glucose tolerance: results from a population-based study in 21,057 individuals. *Diabetes Care* 22:1988–1992, 1999
  17. Salemans THB, Van Dieijen-Visser MP, Brombacher PJ: The value of HbA1c and fructosamine in predicting impaired glucose tolerance: an alternative to OGTT to detect diabetes mellitus or gestational diabetes. *Ann Clin Biochem* 24:447–452, 1987
  18. Peters AL, Davidson MB, Schriger DL, Hasselblad V: A clinical approach for the diagnosis of diabetes mellitus: an analysis using glycosylated hemoglobin levels. *JAMA* 276:1246–1252, 1996
  19. Little RR, England JD, Weidmeyer H, McKenzie EM, Pettitt DJ, Knowler WC, Goldstein DE: Relationship of glycosylated hemoglobin to oral glucose tolerance: implications for diabetes screening. *Diabetes* 37:60–64, 1988
